# Supplementary material
Source: PubMed Central journal article supplement (PMC6987736)
Supplement: Supp_Fig1.pdf [file Supp_Fig1.pdf]

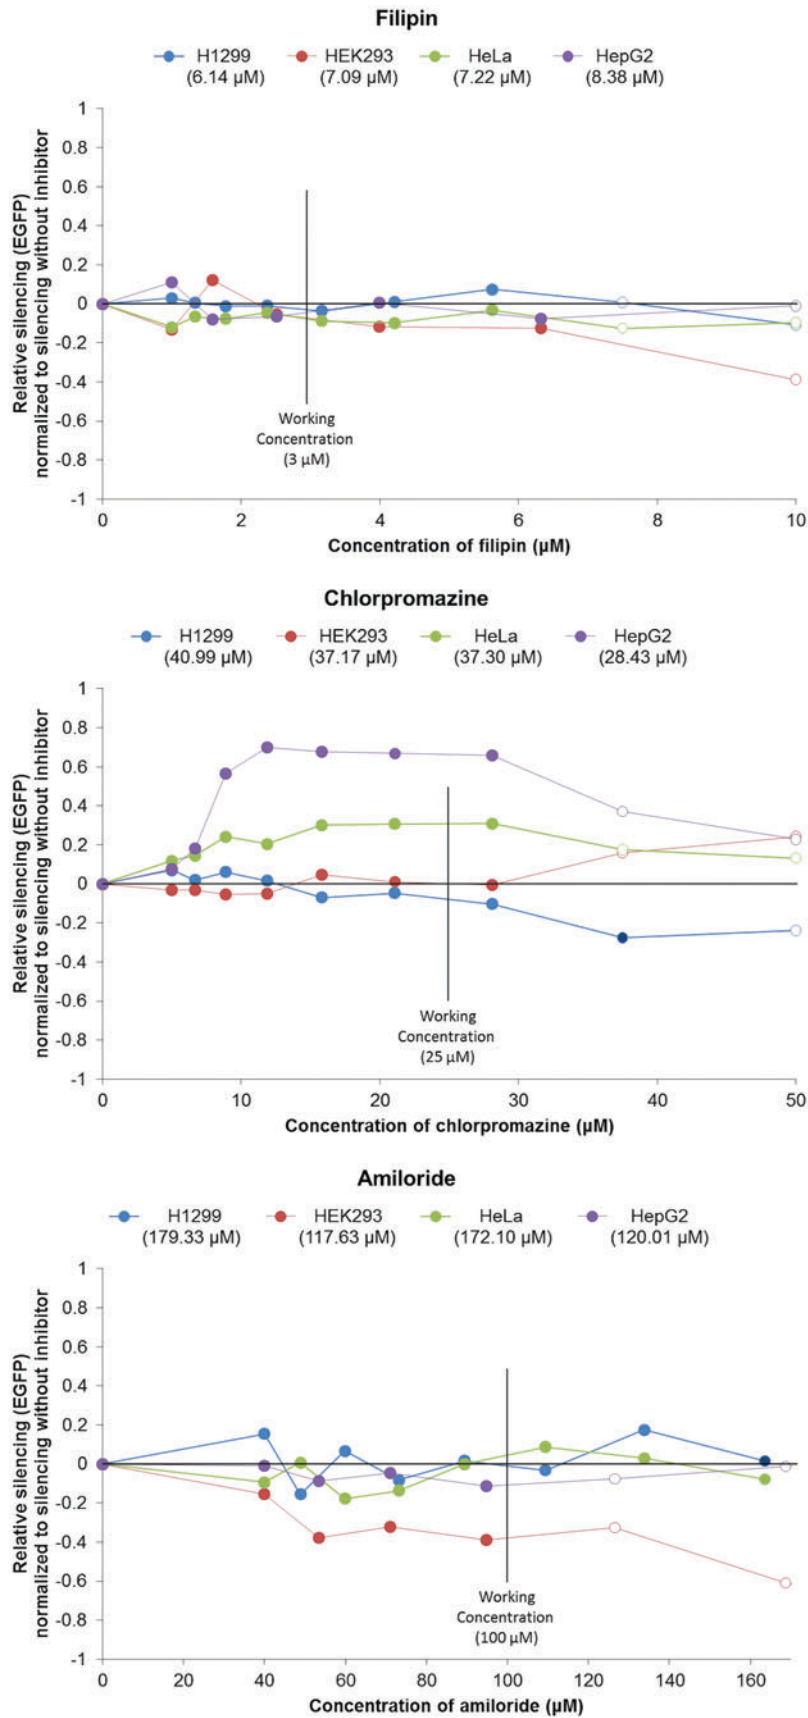

**SUPPLEMENTARY FIG. S1.** Inhibitor dose–response: The effect of each inhibitor on EGFP silencing was assessed over a range of inhibitor concentrations. The value listed below each cell line represents the inhibitor concentration at which 5% toxicity was observed (Supplementary Table S2). Data points that exceed the 5% toxicity dose are indicated with *open symbols*. The working concentration chosen for each inhibitor is indicated with a *vertical black line*.

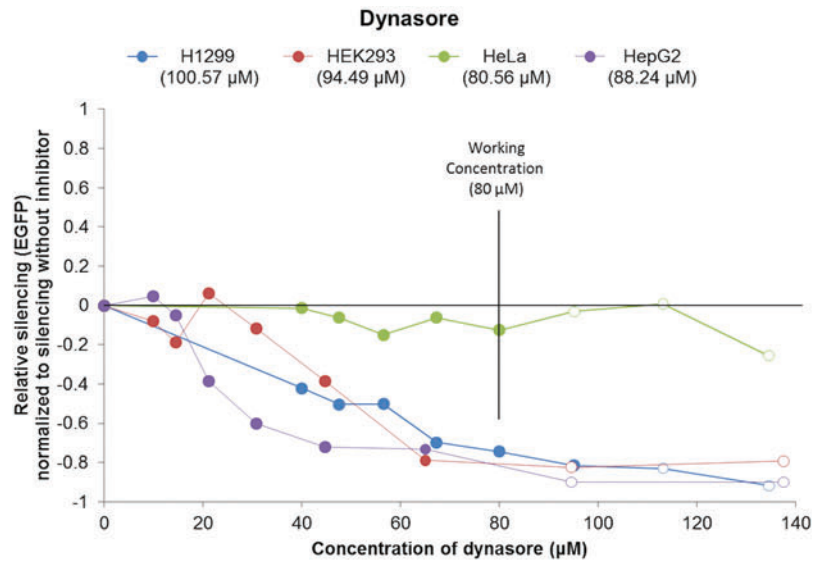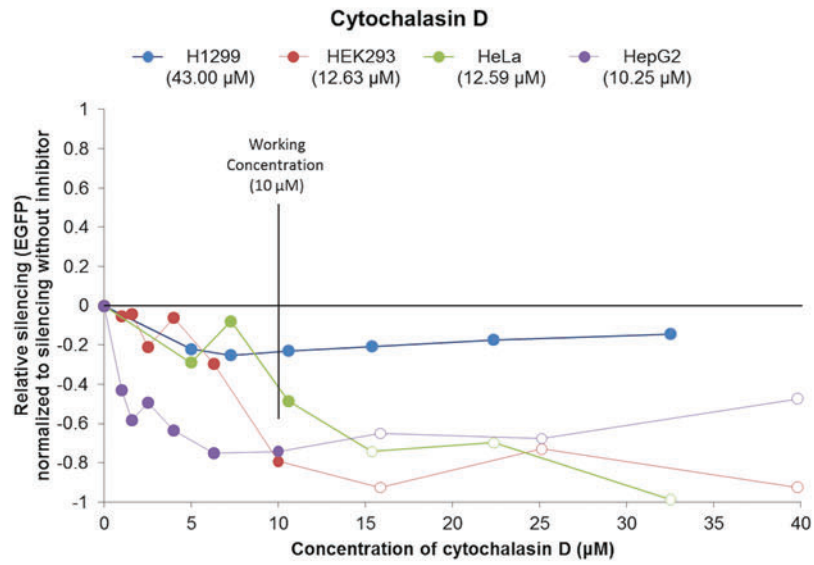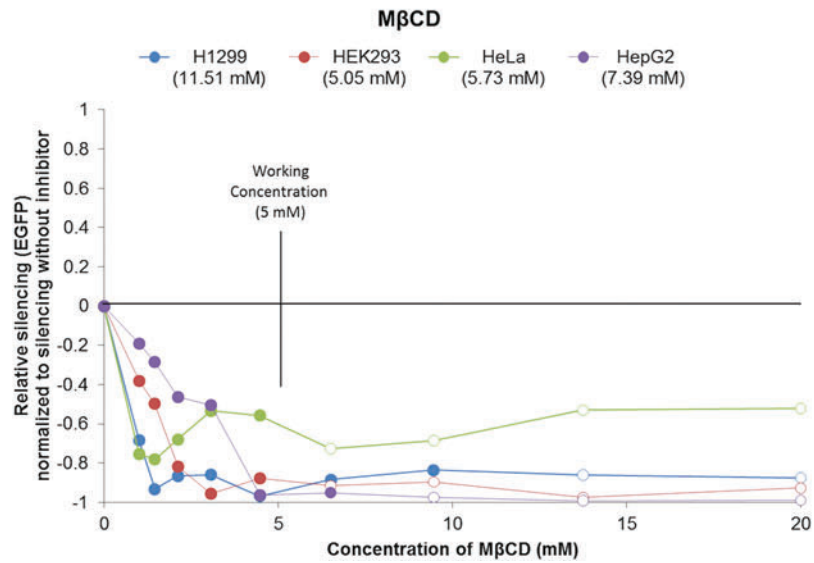

SUPPLEMENTARY FIG. S1. (Continued).
