# Supplementary material
Source: PubMed Central journal article supplement (PMC6987736)
Supplement: Supp_Fig2.pdf [file Supp_Fig2.pdf]

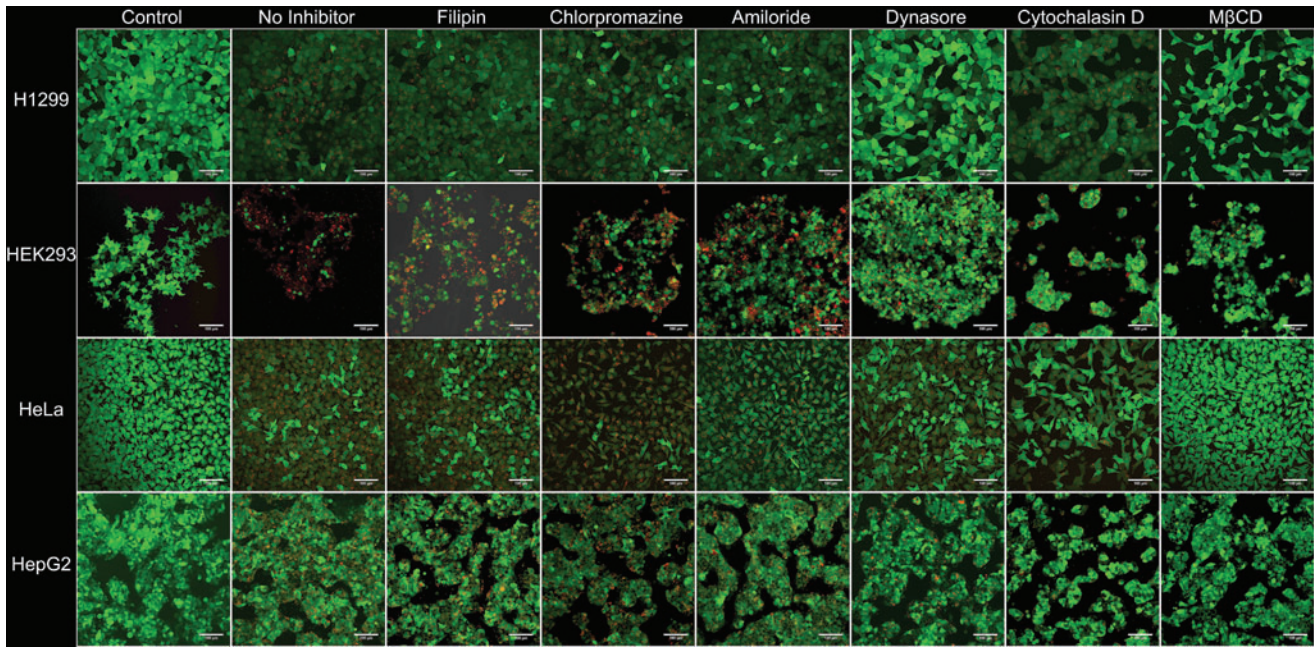

**SUPPLEMENTARY FIG. S2.** Inhibitor microscopy experiments: confocal microscopy images of EGFP-expressing cells (*green*) transfected with 100 nM fluorescently labeled siRNA (*red*) and 2.3 μg/mL LF2K. Cells were pretreated with endocytosis inhibitors and imaged 24 h post-transfection. Scale bars are 100 μm. LF2K, Lipofectamine 2000; siRNA, small interfering RNA.
