# Supplementary material
Source: PubMed Central journal article supplement (PMC6987736)
Supplement: Supp_Fig3.pdf [file Supp_Fig3.pdf]

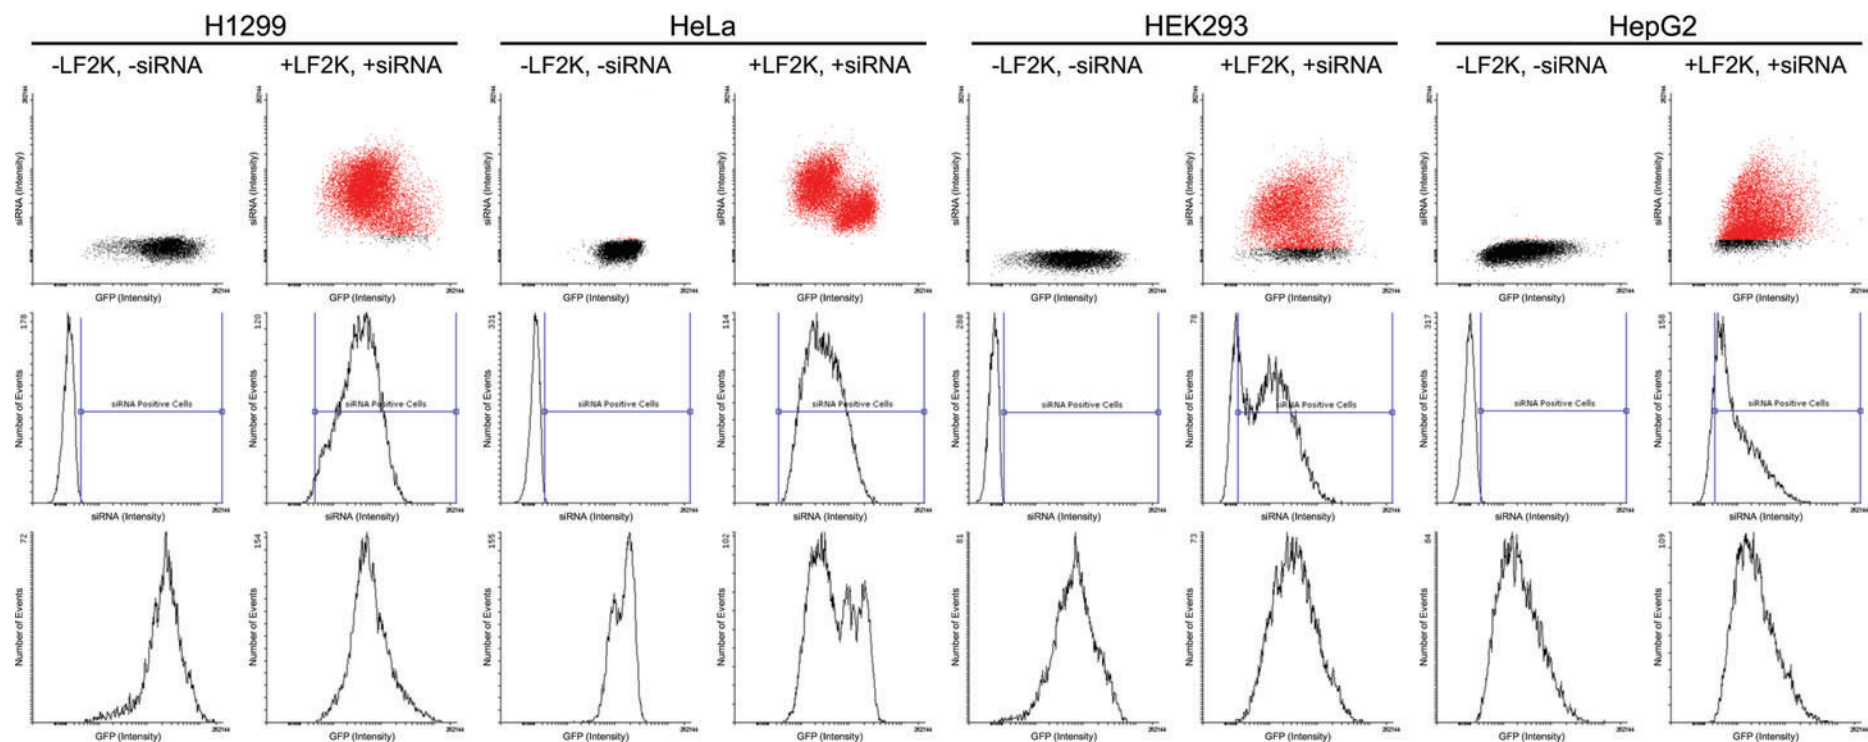

**SUPPLEMENTARY FIG. S3.** Fluorescence distribution: fluorescence distribution of siRNA and EGFP in uninhibited cell lines. The fluorescence signal in the siRNA channel of nontransfected cells (-LF2K and -siRNA) was used to establish a fluorescence range for siRNA-positive cells (demarcated in blue).
