# Supplementary material
Source: PubMed Central journal article supplement (PMC6987736)
Supplement: Supp_Fig4-Table1.pdf [file Supp_Fig4-Table1.pdf]

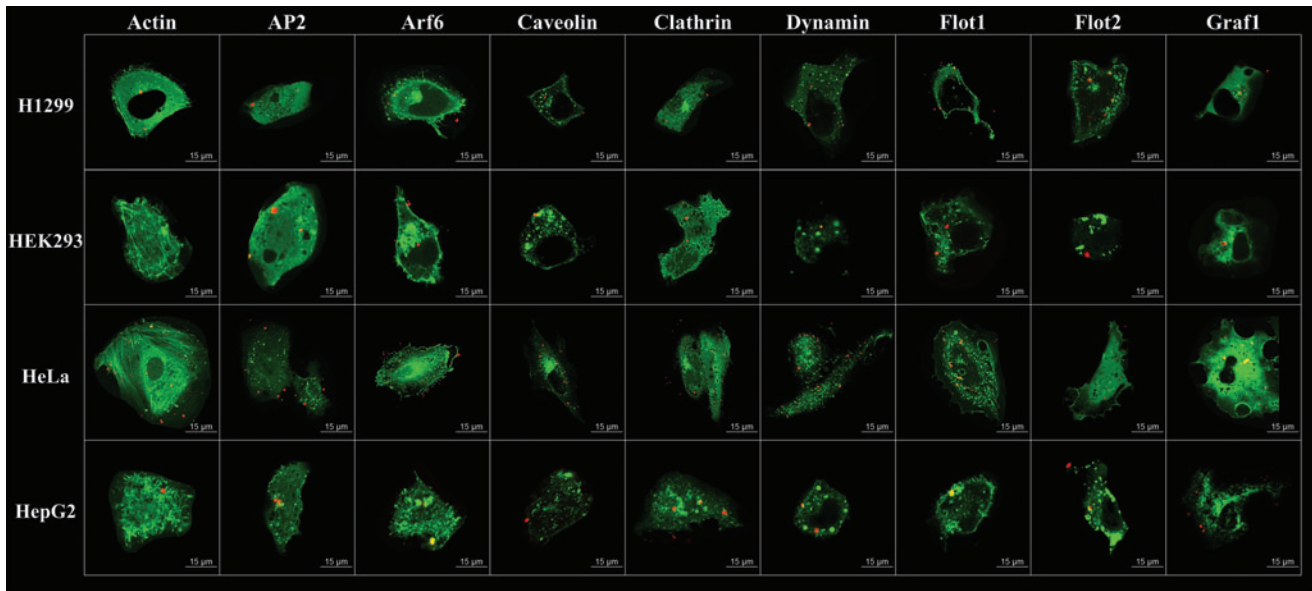

**SUPPLEMENTARY FIG. S4.** Overexpression: confocal microscopy images of cells overexpressing EGFP-labeled endocytic proteins (*green*) and transfected with 100 nM fluorescently labeled siRNA (*red*) and 2.3  $\mu\text{g}/\text{mL}$  LF2K. Cells were fixed and imaged 1 h after transfection of siRNA-LF2K complexes. Scale bars are 15  $\mu\text{m}$ .

**SUPPLEMENTARY TABLE S1. MATERIALS: CELL CULTURE, SOLUTIONS, CHEMICAL INHIBITORS AND PLASMIDS**

| Cell culture                                                                                              | Inhibitors                                          |
|-----------------------------------------------------------------------------------------------------------|-----------------------------------------------------|
| 96-Well plate (No. 3610; Costar)                                                                          | Chlorpromazine hydrochloride (No. C8138-5G; Sigma)  |
| 24-Well plate (No. 3513; Costar)                                                                          | Cytochalasin D (No. C2618-200uL; Sigma)             |
| 24-Well confocal plate (No. 82406; Ibidi)                                                                 | Filipin complex III (No. F4767-1MG; Sigma)          |
| DMEM (No. 11965092; Life Technologies)                                                                    | Dynasore hydrate (No. D7693-25MG; Sigma)            |
| FBS (No. S11550; Atlanta Biological)                                                                      | 5-(N,N-dimethyl)amiloride (No. A4562-25MG; Sigma)   |
| Paraformaldehyde (No. P6148-500g; Sigma)                                                                  | Methyl- $\beta$ -cyclodextrin (No. C4555-5G; Sigma) |
| DPBS: Dulbecco's (+Mg/Ca; No. 14040133; Life Technologies)                                                | Plasmids                                            |
| PBS: Dulbecco's (-Mg/Ca; No. D8537; Sigma)                                                                | pd2EGFP-N1 (No. 6009-1; Clontech)                   |
| Trypsin (No. 25200056; Life Technologies)                                                                 | Wt-dynamin-2-pEGFP (No. 34686; Addgene)             |
| Opti-MEM (No. 11058021; Life Technologies)                                                                | EGFP-actin-7 (No. 56421; Addgene)                   |
| Heparin sulfate (No. H3393-25KU; Sigma)                                                                   | GFP-alpha-adaptin [S1]                              |
| Lipofectamine 2000 (No. 11668019; Life Technologies)                                                      | GFP-clathrin [S2]                                   |
| Fluorescent siRNA: sense DY547-5'-GGCUACGUCCAGGAGCGCA-3'; antisense 5'-UGCGCUCCUGGACGUAGCC-3' (Dharmacon) | Cav1-GFP (No. 14433; Addgene)                       |
|                                                                                                           | pFlot-1-GFP-N1 [S3]                                 |
|                                                                                                           | pFlot-2-GFP-N1 [S3]                                 |
|                                                                                                           | pDEST47-ARF6-GFP (No. 67394; Addgene)               |
|                                                                                                           | pEGFP-C3-GRAF1 [S4]                                 |
| <b>Solutions</b>                                                                                          |                                                     |
| Paraformaldehyde solutions: 2% paraformaldehyde (w/v) in PBS                                              |                                                     |
| Heparin solution: 20 $\mu\text{g}/\text{mL}$ heparin sulfate in DPBS                                      |                                                     |
| Media: 10% FBS (v/v) in DMEM                                                                              |                                                     |

DMEM, Dulbecco's modified Eagle's medium; DPBS, Dulbecco's phosphate-buffered saline; FBS, fetal bovine serum; siRNA, small interfering RNA.
