# Supplementary material
Source: PubMed Central journal article supplement (PMC6987736)
Supplement: Supp_Table2.pdf [file Supp_Table2.pdf]

SUPPLEMENTARY TABLE S2. INHIBITOR TOXICITY

| Cell Lines | Filipin | Chlorpromazine | Amiloride | Dynasore | Cytochalasin D | MBCD   |
|------------|---------|----------------|-----------|----------|----------------|--------|
| H1299      | 6.14    | 40.1           | 179       | 101      | 43.0           | 11,500 |
| HEK293     | 7.09    | 37.2           | 118       | 94.5     | 12.6           | 5,050  |
| HeLa       | 7.22    | 37.3           | 172       | 80.6     | 12.6           | 5,730  |
| HepG2      | 8.38    | 28.4           | 120       | 88.2     | 10.3           | 7,390  |

---

Inhibitor toxicity was assessed within each cell line by measuring EGFP fluorescence over a range of inhibitor concentrations. Reported above is the concentration at which 5% toxicity was observed ( $\mu\text{M}$ ) (Supplementary Figure 1).
