# Supplementary material
Source: PubMed Central journal article supplement (PMC6987736)
Supplement: Supp_Table3.pdf [file Supp_Table3.pdf]

SUPPLEMENTARY TABLE S3. INHIBITOR MATRIX

|                | Graf1 | Clathrin | Caveolin | Arf6 | Flotillin | Macro pinocytosis |
|----------------|-------|----------|----------|------|-----------|-------------------|
| Filipin        |       |          | X        |      |           |                   |
| Chlorpromazine |       | X        |          |      |           |                   |
| Amiloride      | X     |          |          |      |           | X                 |
| Dynasore       | X     | X        | X        |      | X         |                   |
| Cytochalasin D | X     | X        | X        | X    |           | X                 |
| M $\beta$ CD   | X     |          | X        | X    | X         |                   |

Logic matrix illustrating the effects of chemical inhibitors on different endocytic pathways. An X indicates decreased endocytic function as a result of the chemical inhibitor at the concentration used in our experiments, whereas empty spaces indicate that there is no known effect. It should be noted that there are conflicting reports in the literature regarding the role of dynamin in flotillin-mediated endocytosis (See Discussion section in main article for details).
