# Supplementary material
Source: PubMed Central journal article supplement (PMC6987736)
Supplement: Supp_Table4.pdf [file Supp_Table4.pdf]

SUPPLEMENTARY TABLE S4. STATISTICAL ANALYSIS

| Silencing | Filipin | Chlorpromazine | Amiloride | Dynasore | Cytochalasin D | MBCD     |
|-----------|---------|----------------|-----------|----------|----------------|----------|
| H1299     | 0.951   | 0.852          | 0.282     | 1.92E-07 | 1.000          | 0.000    |
| HEK293    | 0.674   | 0.867          | 4.46E-04  | 6.82E-07 | 3.98E-07       | 6.24E-08 |
| HeLa      | 0.624   | 0.001          | 0.918     | 0.275    | 8.71E-08       | 0.000    |
| HepG2     | 0.980   | 1.551E-04      | 0.698     | 1.000    | 8.92E-05       | 0.002    |

  

| Accumulation | Filipin | Chlorpromazine | Amiloride | Dynasore | Cytochalasin D | MBCD     |
|--------------|---------|----------------|-----------|----------|----------------|----------|
| H1299        | 0.505   | 0.000          | 0.950     | 7.60E-08 | 0.516          | 6.44E-08 |
| HEK293       | 0.471   | 0.996          | 4.31E-05  | 5.34E-06 | 8.98E-08       | 3.68E-07 |
| HeLa         | 0.553   | 2.26E-04       | 0.067     | 0.192    | 0.001          | 1.31E-07 |
| HepG2        | 0.979   | 5.97E-08       | 0.669     | 0.452    | 4.16E-07       | 5.78E-08 |

  

| Overexpression | Dynamain | Actin | AP2   | Clathrin | Caveolin | Flot1    | Flot2 | Arf6     | Graf1    |
|----------------|----------|-------|-------|----------|----------|----------|-------|----------|----------|
| H1299          | 1.000    | 0.755 | 0.011 | 1.88E-06 | 0.919    | 1.08E-07 | 0.999 | 1.000    | 0.403    |
| HEK293         | 0.012    | 0.558 | 1.000 | 0.027    | 1.48E-04 | 0.998    | 0.734 | 0.044    | 9.96E-06 |
| HeLa           | 1.000    | 0.042 | 0.006 | 0.039    | 0.149    | 0.999    | 0.282 | 2.63E-04 | 1.000    |
| HepG2          | 0.559    | 0.004 | 0.002 | 0.019    | 0.959    | 0.456    | 0.999 | 1.92E-05 | 0.997    |

  

| Silencing:<br>Co-culture | Filipin | Chlorpromazine | Amiloride | Dynasore | Cytochalasin D | MBCD     |
|--------------------------|---------|----------------|-----------|----------|----------------|----------|
| H1299                    | 0.889   | 0.001          | 0.350     | 2.03E-04 | 0.001          | 0.000    |
| HEK293                   | 0.584   | 1.000          | 8.03E-05  | 2.81E-05 | 6.69E-05       | 4.16E-08 |
| HeLa                     | 0.935   | 0.003          | 0.915     | 0.007    | 7.30E-05       | 0.000    |
| HepG2                    | 0.966   | 2.81E-06       | 0.998     | 1.000    | 0.007          | 0.001    |

  

| Accumulation:<br>Co-culture | Filipin | Chlorpromazine | Amiloride | Dynasore | Cytochalasin D | MBCD     |
|-----------------------------|---------|----------------|-----------|----------|----------------|----------|
| H1299                       | 1.000   | 4.01E-04       | 1.000     | 0.043    | 1.43E-06       | 1.31E-07 |
| HEK293                      | 0.829   | 0.107          | 1.26E-07  | 1.82E-05 | 0.000          | 0.000    |
| HeLa                        | 0.907   | 1.41E-05       | 0.246     | 1.74E-06 | 1.23E-07       | 3.40E-07 |
| HepG2                       | 0.996   | 0.001          | 0.849     | 0.998    | 0.040          | 1.01E-04 |

*p*-values for Figures 1–4. Analyses were performed using two-way ANOVA, followed by Tukey’s HSD *post-hoc* analysis in Origin 8. *P*<0.05 was used to determine significance.
