# Supplementary material
Source: PubMed Central journal article supplement (PMC6987736)
Supplement: Supp_Table5.pdf [file Supp_Table5.pdf]

SUPPLEMENTARY TABLE S5. GENE EXPRESSION DATA FOR ENDOCYTTIC PROTEINS

| Cell Line | ETS1         | Graf1       | DNM1        | DNM2        | Cdc42        | Arf1          | Actb          |
|-----------|--------------|-------------|-------------|-------------|--------------|---------------|---------------|
| H1299     | <u>44500</u> | 706         | 1420        | 6140        | 22400        | 73900         | 381000        |
| HEK293    | 4590         | <u>3140</u> | <u>2460</u> | <u>3400</u> | <u>31700</u> | <u>133000</u> | 371000        |
| HeLa      | 3380         | 1000        | 10600       | 5500        | 22700        | 96900         | <u>580000</u> |
| HepG2     | 1510         | 2850        | 802         | 3670        | 8180         | 49000         | <u>251000</u> |

Expression is listed in TPM from Affymetrix data and normalized in GENEVESTIGATOR<sup>®</sup>. The following experimental IDs were used: HS-00859, HS-01099, HS-00217, HS-01921, HS-00048, and HS-00856.

TPM, transcripts per million.
